# Supplementary material for: Identification of a novel set of genes reflecting different in vivo invasive patterns of human GBM cells
Source: PubMed Central journal article supplement (PMC3502598; doi:10.1186/1471-2407-12-358), 2012-08-17
Supplement: 1471-2407-12-358-S1.pdf [file 1471-2407-12-358-S1.pdf]

**Additional file 1.** Normalized expression levels for selected genes as determined by microarray analysis

**Stem cell markers**

| Probe Set ID | PT1        | PT2        | PT3        | PT4        | PT5        | PT6        | Gene Symbol | mRNA Accession |
|--------------|------------|------------|------------|------------|------------|------------|-------------|----------------|
| 7970727      | 314.626635 | 298.269366 | 225.084515 | 272.437408 | 272.437408 | 272.437408 | CDX2        | NM_001265      |
| 7987365      | 104.918989 | 93.2385071 | 79.2542282 | 106.533991 | 100.733658 | 104.668535 | NANOG       | NM_024865      |
| 8124889      | 156.479299 | 147.00078  | 125.748293 | 147.00078  | 147.00078  | 147.00078  | POU5F1      | NM_002701      |
| 8084165      | 788.279803 | 1923.79586 | 2927.57416 | 3864.02845 | 2988.40507 | 3238.14079 | SOX2        | NM_003106      |
| 8015607      | 1312.98981 | 2095.32744 | 2639.94105 | 2991.72116 | 2026.70444 | 1971.78973 | STAT3       | NM_139276      |
| 8099476      | 40.3842824 | 147.727541 | 270.552545 | 51.9273969 | 57.2597315 | 363.494569 | PROM1       | NM_006017      |
| 7921088      | 490.320748 | 1543.79984 | 2099.65998 | 2127.12633 | 1589.77844 | 1738.34654 | NES         | NM_006617      |

**Nervous System markers**

| Probe Set ID | PT1        | PT2        | PT3        | PT4        | PT5        | PT6        | Gene Symbol | mRNA Accession |
|--------------|------------|------------|------------|------------|------------|------------|-------------|----------------|
| 7980580      | 114.736054 | 57.9670033 | 135.741495 | 324.544838 | 479.867069 | 295.958073 | GALC*       | NM_000153      |
| 8016128      | 276.637322 | 1101.84838 | 3275.5694  | 4939.87904 | 2121.48682 | 328.115969 | GFAP        | NM_002055      |
| 8047926      | 128.100562 | 1387.20953 | 1623.20556 | 3092.76178 | 3563.27966 | 3086.44421 | MAP2        | NM_002374      |
| 8072229      | 131.621011 | 115.282363 | 77.8014965 | 115.17829  | 115.282363 | 115.282363 | NEFH        | NM_021076      |
| 7998063      | 1147.54897 | 1105.3289  | 843.572936 | 1281.11121 | 1080.7971  | 1038.90642 | TUBB3       | NM_006086      |
| 7927482      | 204.115793 | 191.536429 | 134.546122 | 172.39164  | 175.210813 | 184.370241 | CHAT        | NM_020549      |
| 7945712      | 315.340574 | 258.091533 | 177.777262 | 225.01775  | 279.138633 | 253.748943 | TH          | NM_199292      |
| 8062539      | 215.946481 | 133.511296 | 134.245415 | 167.870044 | 155.361153 | 157.715976 | SLC32A1     | NM_080552      |
| 7938975      | 75.2493388 | 49.8919447 | 44.3598936 | 56.564461  | 57.543258  | 56.564461  | SLC17A6     | NM_020346      |
| 8038367      | 164.594464 | 140.662212 | 139.530142 | 140.662212 | 137.231037 | 140.305913 | SLC17A7     | NM_020309      |
| 8105220      | 158.04395  | 120.660863 | 98.9207999 | 120.660863 | 124.491463 | 115.453172 | ISL1        | NM_002202      |
| 8023889      | 149.859424 | 120.284172 | 85.7582761 | 105.517099 | 128.026531 | 109.623326 | MBP         | NM_001025101   |
| 8068231      | 158.807474 | 459.441383 | 605.612847 | 572.491713 | 530.344134 | 531.097526 | OLIG2       | NM_005806      |

**PDGF receptor and IDH gene transcripts**

| Probe Set ID | PT1        | PT2        | PT3        | PT4        | PT5        | PT6        | Gene Symbol | mRNA Accession |
|--------------|------------|------------|------------|------------|------------|------------|-------------|----------------|
| 8095080      | 4679.53674 | 558.105866 | 1739.94984 | 3898.78802 | 2349.81262 | 3655.2136  | PDGFRA      | NM_006206      |
| 8115099      | 226.347726 | 189.568047 | 258.072928 | 177.641765 | 240.329177 | 208.87022  | PDGFRB      | NM_002609      |
| 7985134      | 1489.70402 | 1113.51093 | 1195.7748  | 1412.9454  | 851.3243   | 780.04795  | IDH3A       | NM_005530      |
| 7991374      | 990.547261 | 1331.52149 | 1111.30569 | 1000.83193 | 1113.84286 | 1205.59531 | IDH2        | NM_002168      |
| 8058552      | 1838.95441 | 2815.56746 | 2803.90159 | 3831.57014 | 3516.19655 | 4648.17928 | IDH1        | NM_005896      |
| 8064522      | 1176.38127 | 1688.44562 | 1448.33538 | 1408.6134  | 1581.62296 | 1048.78991 | IDH3B       | NM_174856      |
| 8175844      | 879.742805 | 1218.34753 | 1264.89332 | 981.672506 | 892.637744 | 821.203519 | IDH3G       | NM_174869      |

\*GALC is included in the 34 regulated genes (Table 2)
