# Supplementary material for: Identification of a novel set of genes reflecting different in vivo invasive patterns of human GBM cells
Source: PubMed Central journal article supplement (PMC3502598; doi:10.1186/1471-2407-12-358), 2012-08-17
Supplement: 1471-2407-12-358-S2.pdf [file 1471-2407-12-358-S2.pdf]

**Additional File 2.** Sequences accession numbers and primers used for Real-Time PCR analysis

| Gene          | Accession number | Forward (5'-3')       | Reverse (5'-3')              |
|---------------|------------------|-----------------------|------------------------------|
| <i>BCAN</i>   | NM_021948        | TTACGGAGACATGGATGGCTT | GGAGGGTCACCCAGGAACA          |
| <i>CADM4</i>  | NM_145296        | GTCCAATAAGCACGGCCATG  | GAACCGACGTCTGAGCCTCTA        |
| <i>EIF1AY</i> | NM_004681        | AGAGGTCTCACGAGGCTGTCA | CCCTGCGCCTGTTTTTACC          |
| <i>GRIA2</i>  | NM_001083619     | CTGACACCCCACATCGACAA  | AATAGCATAGACTCCTCTCGAAAAC TG |
| <i>PPIA</i>   | NM_021130        | TTAGCCATGGTCAACCCAC   | GTCTTTGGGACCTTGCTGCA         |
| <i>RPS4Y1</i> | NM_001008        | TGCTGTTACCGCATCACA    | CAGGTGAGGGATTCCCTTCA         |
| <i>SEMA5A</i> | NM_003966        | AGCCTCTGGCGTCCAAGTC   | ACGCTACTGGATCTTGCCACA        |
