# Supplementary material for: Identification of a novel set of genes reflecting different in vivo invasive patterns of human GBM cells
Source: PubMed Central journal article supplement (PMC3502598; doi:10.1186/1471-2407-12-358), 2012-08-17
Supplement: 1471-2407-12-358-S3.pdf [file 1471-2407-12-358-S3.pdf]

**Additional File 3.** Multiplex ligation-dependent probe amplification (MLPA) analysis.

| Gene                       | Band     | PT1 | PT2 | PT3 | PT4 | PT5 | PT6 |
|----------------------------|----------|-----|-----|-----|-----|-----|-----|
| DVL1 probe 12057-L04066    | 01p36.33 |     |     |     |     |     |     |
| PRDM16 probe 04703-L04081  | 01p36.32 |     |     |     |     |     |     |
| CHD5 probe 09114-L09174    | 01p36.31 |     |     |     |     |     |     |
| CAMTA1 probe 04695-L13854  | 01p36.31 |     |     |     |     |     |     |
| KIF1B probe 04681-L04462   | 01p36.22 |     |     |     |     |     |     |
| MDM4 probe 03185-L03594    | 01q32.1  |     |     |     |     |     |     |
| MDM4 probe 03186-L02525    | 01q32.1  |     |     |     |     |     |     |
| MYCN probe 02572-L09025    | 02p24.3  |     |     |     |     |     |     |
| MYCN probe 03327-L02466    | 02p24.3  |     |     |     |     |     |     |
| ALK probe 08324-L08193     | 02p23.2  |     |     |     |     |     |     |
| ALK probe 08323-L08192     | 02p23.2  |     |     |     |     |     |     |
| VHL probe 01160-L00716     | 03p25.3  |     |     |     |     |     |     |
| VHL probe 01161-L00717     | 03p25.3  |     |     |     |     |     |     |
| FHIT probe 02290-L01781    | 03p14.2  |     |     |     |     |     |     |
| FHIT probe 02293-L13849    | 03p14.2  |     |     |     |     |     |     |
| PDGFRA probe 10247-L10719  | 04q12    |     |     |     |     |     |     |
| PDGFRA probe 12762-L13878  | 04q12    |     |     |     |     |     |     |
| KIT probe 12756-L14066     | 04q12    |     |     |     |     |     |     |
| KIT probe 12761-L13877     | 04q12    |     |     |     |     |     |     |
| KDR probe 12755-L14064     | 04q12    |     |     |     |     |     |     |
| KDR probe 12758-L13874     | 04q12    |     |     |     |     |     |     |
| DHFR probe S0428-L14095    | 05q14.1  |     |     |     |     |     |     |
| DHFR probe 12753-L13869    | 05q14.1  |     |     |     |     |     |     |
| APC probe 11990-L12817     | 05q22.2  |     |     |     |     |     |     |
| APC probe 01550-L00993     | 05q22.2  |     |     |     |     |     |     |
| EGFR probe 02063-L03283    | 07p11.2  |     |     |     |     |     |     |
| EGFR probe 06408-L05383    | 07p11.2  |     |     |     |     |     |     |
| MET probe 10314-L10828     | 07q31.2  |     |     |     |     |     |     |
| MET probe 10320-L10834     | 07q31.2  |     |     |     |     |     |     |
| SMO probe 12750-L13866     | 07q32.1  |     |     |     |     |     |     |
| SMO probe 12757-L13873     | 07q32.1  |     |     |     |     |     |     |
| BRAF probe 10507-L11060    | 07q34    |     |     |     |     |     |     |
| BRAF probe 04260-L14063    | 07q34    |     |     |     |     |     |     |
| FGFR1 probe 04184-L03583   | 08p11.23 |     |     |     |     |     |     |
| FGFR1 probe 01046-L01837   | 08p11.23 |     |     |     |     |     |     |
| MYC probe 00672-L00169     | 08q24.21 |     |     |     |     |     |     |
| MYC probe 00580-L13856     | 08q24.21 |     |     |     |     |     |     |
| CDKN2A probe 01528-L06031  | 09p21.3  |     |     |     |     |     |     |
| CDKN2A probe 01524-L13846  | 09p21.3  |     |     |     |     |     |     |
| CDKN2B probe 03814-L03851  | 09p21.3  |     |     |     |     |     |     |
| PTCH1 probe 03709-L03163   | 09q22.32 |     |     |     |     |     |     |
| PTCH1 probe 09616-L13843   | 09q22.32 |     |     |     |     |     |     |
| ABL1 probe 12502-L13552    | 09q34.12 |     |     |     |     |     |     |
| ABL1 probe 12516-L13566    | 09q34.12 |     |     |     |     |     |     |
| TSC1 probe 04324-L03897    | 09q34.2  |     |     |     |     |     |     |
| TSC1 probe 02351-L04302    | 09q34.2  |     |     |     |     |     |     |
| TSC1 probe 04108-L13904    | 09q34.2  |     |     |     |     |     |     |
| RET probe 05502-L04925     | 10q11.21 |     |     |     |     |     |     |
| RET probe 05508-L13858     | 10q11.21 |     |     |     |     |     |     |
| PTEN probe 06729-L06339    | 10q23.31 |     |     |     |     |     |     |
| PTEN probe 03638-L02945    | 10q23.31 |     |     |     |     |     |     |
| PTEN probe 03640-L02947    | 10q23.31 |     |     |     |     |     |     |
| WT1 probe 02755-L13851     | 11p13    |     |     |     |     |     |     |
| WT1 probe 02757-L14090     | 11p13    |     |     |     |     |     |     |
| CCND1 probe 05401-L04807   | 11q13.2  |     |     |     |     |     |     |
| CCND1 probe 05402-L04808   | 11q13.2  |     |     |     |     |     |     |
| CCND1 probe 00583-L00148   | 11q13.2  |     |     |     |     |     |     |
| CCND2 probe 03177-L02516   | 12p13.32 |     |     |     |     |     |     |
| CCND2 probe 00498-L00084   | 12p13.32 |     |     |     |     |     |     |
| CDK4 probe 03174-L12434    | 12q14.1  |     |     |     |     |     |     |
| CDK4 probe 03173-L02512    | 12q14.1  |     |     |     |     |     |     |
| MDM2 probe 07179-L06788    | 12q15    |     |     |     |     |     |     |
| MDM2 probe 07180-L06789    | 12q15    |     |     |     |     |     |     |
| BRCA2 probe 01599-L13847   | 13q13.1  |     |     |     |     |     |     |
| BRCA2 probe 01603-L13850   | 13q13.1  |     |     |     |     |     |     |
| RB1 probe 02583-L13845     | 13q14.2  |     |     |     |     |     |     |
| RB1 probe 01798-L01361     | 13q14.2  |     |     |     |     |     |     |
| MIRN15A probe 04019-L03416 | 13q14.3  |     |     |     |     |     |     |
| DLEU1 probe 01062-L00639   | 13q14.3  |     |     |     |     |     |     |
| TSC2 probe 01819-L13844    | 16p13.3  |     |     |     |     |     |     |
| TSC2 probe 03168-L02571    | 16p13.3  |     |     |     |     |     |     |
| TP53 probe 08785-L01159    | 17p13.1  |     |     |     |     |     |     |
| TP53 probe 02378-L13853    | 17p13.1  |     |     |     |     |     |     |
| TP53 probe 02262-L01496    | 17p13.1  |     |     |     |     |     |     |
| AURKB probe 12749-L13865   | 17p13.1  |     |     |     |     |     |     |
| AURKB probe 12759-L13875   | 17p13.1  |     |     |     |     |     |     |
| NF1 probe 04074-L03710     | 17q11.2  |     |     |     |     |     |     |
| NF1 probe 02519-L01950     | 17q11.2  |     |     |     |     |     |     |
| ERBB2 probe 00675-L00572   | 17q12    |     |     |     |     |     |     |
| ERBB2 probe 00717-L00390   | 17q12    |     |     |     |     |     |     |
| TOP2A probe 01056-L14067   | 17q21.2  |     |     |     |     |     |     |
| TOP2A probe 01055-L00628   | 17q21.2  |     |     |     |     |     |     |
| BRCA1 probe 02821-L02250   | 17q21.31 |     |     |     |     |     |     |
| BRCA1 probe 00830-L14092   | 17q21.31 |     |     |     |     |     |     |
| BRCA1 probe 00827-L00342   | 17q21.31 |     |     |     |     |     |     |
| SMAD4 probe 05143-L04533   | 18q21.2  |     |     |     |     |     |     |
| SMAD4 probe 07800-L07555   | 18q21.2  |     |     |     |     |     |     |
| STK11 probe 03124-L13848   | 19p13.3  |     |     |     |     |     |     |
| STK11 probe 03126-L03339   | 19p13.3  |     |     |     |     |     |     |
| FKBP8 probe 12754-L14091   | 19p13.1  |     |     |     |     |     |     |
| FKBP8 probe 12751-L13867   | 19p13.1  |     |     |     |     |     |     |
| AURKA probe S0429-L14094   | 20q13.31 |     |     |     |     |     |     |
| AURKA probe 10236-L14068   | 20q13.31 |     |     |     |     |     |     |
| SMARCB1 probe 08280-L08094 | 22q11.23 |     |     |     |     |     |     |
| SMARCB1 probe 08295-L08109 | 22q11.23 |     |     |     |     |     |     |
| FAM123B probe 12760-L13876 | Xq11.1   |     |     |     |     |     |     |
| FAM123B probe 12752-L13868 | Xq11.1   |     |     |     |     |     |     |
| AR probe 01690-L00423      | Xq11.2   |     |     |     |     |     |     |
| AR probe 12604-L14065      | Xq11.2   |     |     |     |     |     |     |

BAL MAL NC MAG AMPL

The MLPA analysis was performed as outlined in the Materials and Methods section. For a prompt identification of the gene targeted by the oligonucleotide probes, an alternating yellow or white background was used for probe identification numbers showed in the Gene column. Similarly, in the cytogenetic band (Band) column, we used an alternating gray and white background to indicate probes targeting different chromosomal arms. For each patient long-term culture of tumorigenic GBM cells (PT1-PT6), gains and losses were assigned by comparing the peaks between the patient and the reference samples (DNA from normal human astrocytes). A value =0 was considered as a biallelic loss (purple, BAL), a value <0.7 as a (monoallelic) DNA loss (red, MAL), a value between 1.3 and 2.0 as a (monoallelic) DNA gain (green, MAG) and a value between 0.7 and 1.3 as unchanged with respect to the reference (NC, black). The examined region was considered as amplified for values >2 (light green, AMPL).
