# Supplementary material for: Identification of a novel set of genes reflecting different in vivo invasive patterns of human GBM cells
Source: PubMed Central journal article supplement (PMC3502598; doi:10.1186/1471-2407-12-358), 2012-08-17

**Additional file 4.** FISH analysis of 50 metaphases for each cell line with WCP10 probe.

| <b>Chr.10 copies</b> | <b>1 (%)</b> | <b>2 (%)</b> | <b>3 (%)</b> | <b>4 (%)</b> |
|----------------------|--------------|--------------|--------------|--------------|
| PT1                  | -            | 2 (4)        | 47 (94)      | 1 (2)        |
| PT2 *                | -            | 50 (100)     | -            | -            |
| PT3                  | 6 (12)       | 27 (54)      | 17 (34)      | -            |
| PT4                  | -            | 8 (16)       | 42 (84)      | -            |
| PT5                  | 3 (6)        | 47 (94)      | -            | -            |
| PT6                  | 1 (2)        | 48 (96)      | 1 (2)        | -            |

\*In PT2 metaphases, besides the two chr 10 copies, some chr 10 material was present at the distal end of the p-arm of one (14% of the metaphases) or two (86% of the metaphases) derivative copies of an unknown chromosome.

For each cell line, a representative image is shown (FISH, left; DAPI-banding, right):

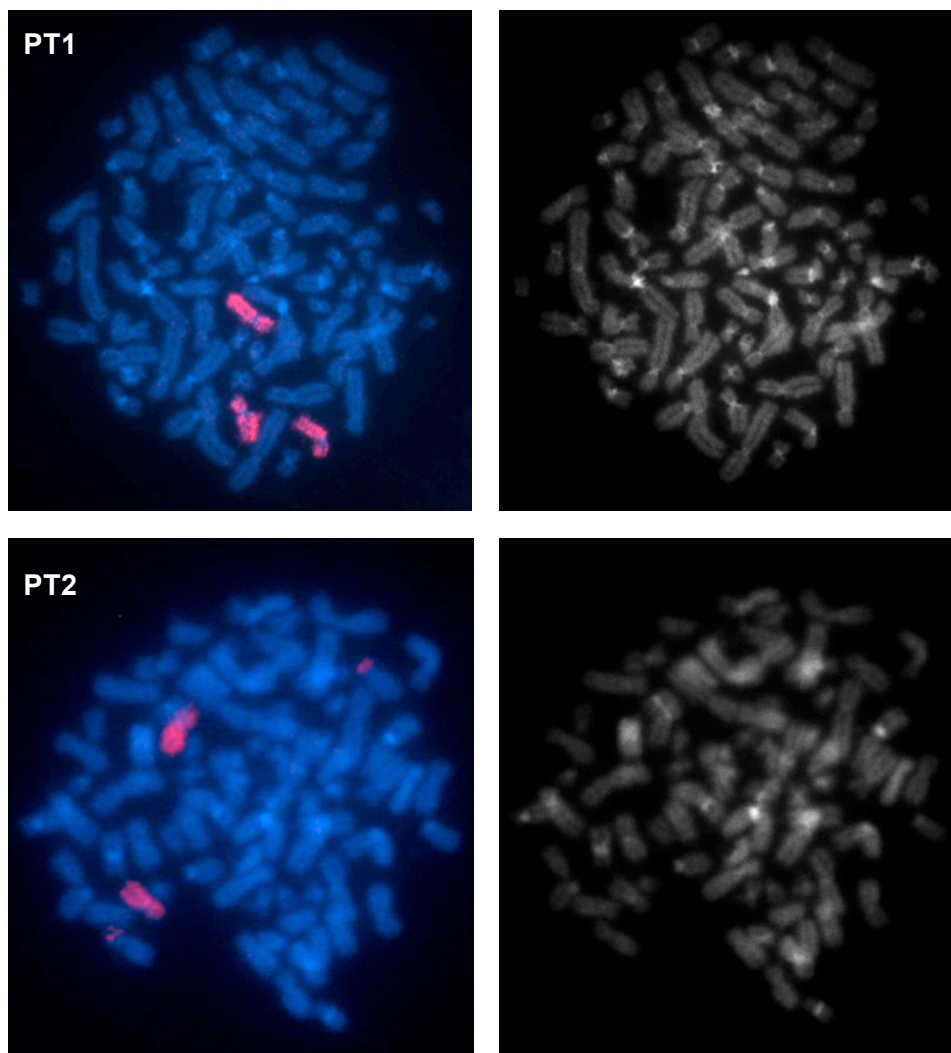

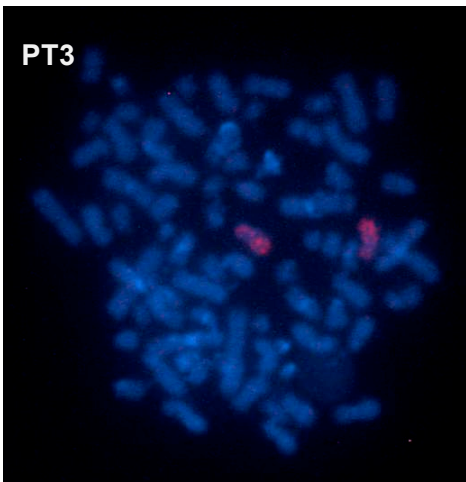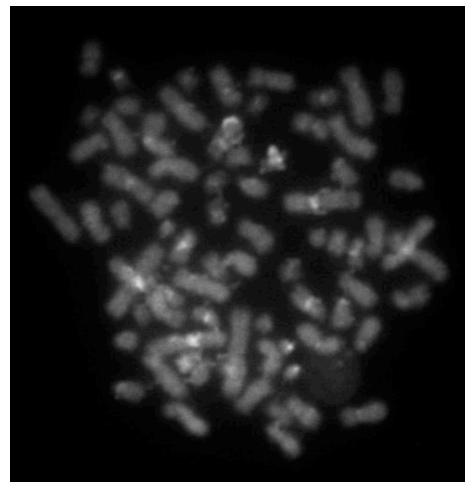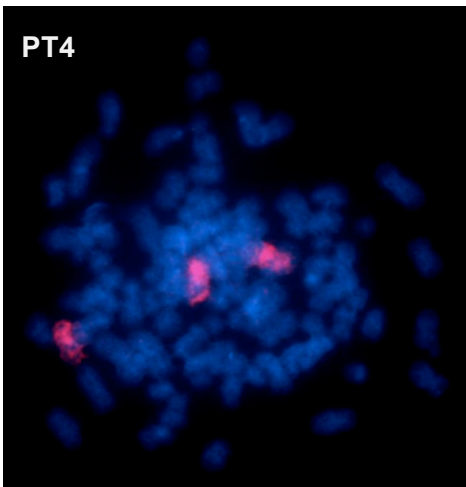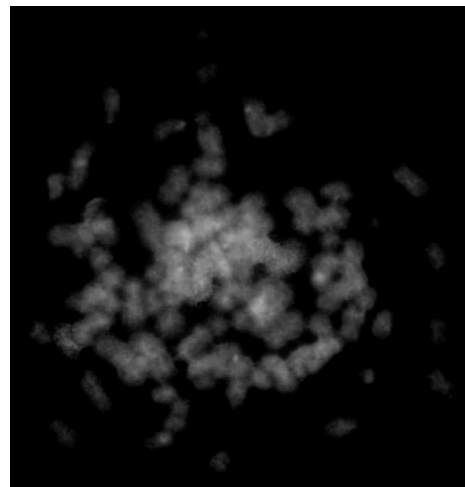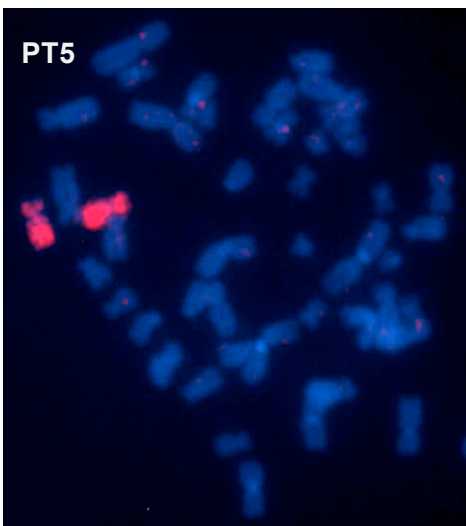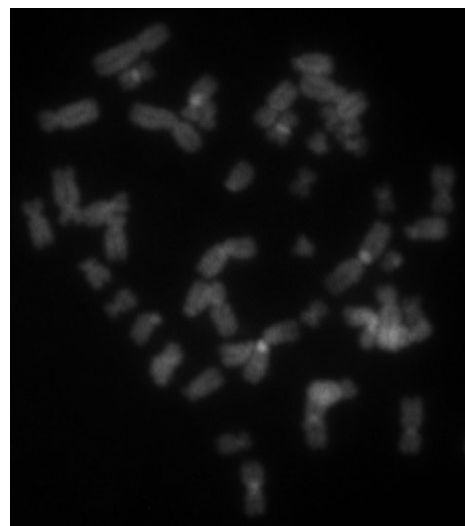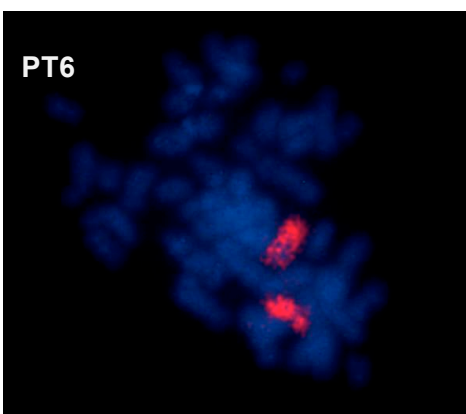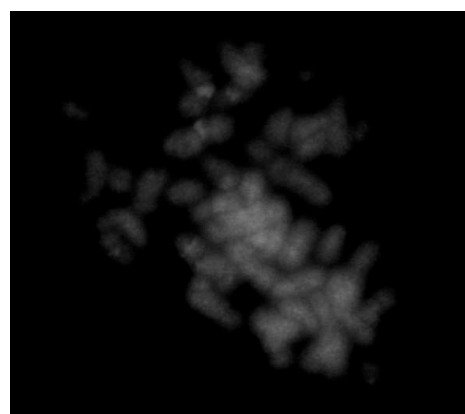

Supplement: 1471-2407-12-358-S4.pdf [file 1471-2407-12-358-S4.pdf]
