# Supplementary material for: Identification of a novel set of genes reflecting different in vivo invasive patterns of human GBM cells
Source: PubMed Central journal article supplement (PMC3502598; doi:10.1186/1471-2407-12-358), 2012-08-17
Supplement: 1471-2407-12-358-S5.pdf [file 1471-2407-12-358-S5.pdf]

**Additional File 5.** Gene symbol, full gene name and function of deregulated genes shown in Table 2.

| GeneSymbol       | Description                                                                                                                                 | mRNA Accession | Function (www.genecards.org)                                                                                                                                                                                                                                                                                                                                                                                                                                                                                                                                                                                                                                         |
|------------------|---------------------------------------------------------------------------------------------------------------------------------------------|----------------|----------------------------------------------------------------------------------------------------------------------------------------------------------------------------------------------------------------------------------------------------------------------------------------------------------------------------------------------------------------------------------------------------------------------------------------------------------------------------------------------------------------------------------------------------------------------------------------------------------------------------------------------------------------------|
| ABCA1            | ATP-binding cassette, sub-family A (ABC1), member 1                                                                                         | NM_005502      | The membrane-associated protein encoded by this gene is a member of the superfamily of ATP-binding cassette (ABC) transporters. ABC proteins transport various molecules across extra- and intracellular membranes. ABC genes are divided into seven distinct subfamilies (ABCA1, MDR/TAP, MRP, ALD, OABP, GCN20, White). This protein is a member of the ABC1 subfamily. Members of the ABC1 subfamily comprise the only major ABC subfamily found exclusively in multicellular eukaryotes. With cholesterol as its substrate, this protein functions as a cholesterol efflux pump in the cellular lipid removal pathway.                                           |
| AMIGO2           | Adhesion molecule with Ig-like domain 2                                                                                                     | BC095477       | Required for depolarization-dependent survival of cultured cerebellar granule neurons. May mediate homophilic as well as heterophilic cell-cell interaction with AMIGO1 or AMIGO3. May contribute to signal transduction through its intracellular domain. May be required for tumorigenesis of a subset of gastric adenocarcinomas.                                                                                                                                                                                                                                                                                                                                 |
| ATCAY            | Ataxia, cerebellar, Cayman type                                                                                                             | NM_033064      | This gene encodes a neuron-restricted protein that contains a CRAL-TRIO motif common to proteins that bind small lipophilic molecules. Mutations in this gene are associated with cerebellar ataxia, Cayman type.                                                                                                                                                                                                                                                                                                                                                                                                                                                    |
| BCAN             | Brevican                                                                                                                                    | NM_021948      | May play a role in the terminally differentiating and the adult nervous system during postnatal development. Could stabilize interactions between hyaluronan (HA) and brain proteoglycans                                                                                                                                                                                                                                                                                                                                                                                                                                                                            |
| C6orf32 (FAM65B) | Chromosome 6 open reading frame 32                                                                                                          | NM_015864      | The protein encoded by this gene stimulates the formation of a non-mitotic multinucleate syncytium from proliferative cytotrophoblasts during trophoblast differentiation. Two alternatively spliced transcript variants have been found for this gene. Isoform 2 play a role in promoting myogenic cell differentiation, cytoskeletal rearrangement and filopodia formation.                                                                                                                                                                                                                                                                                        |
| CA8              | Carbonic anhydrase VIII                                                                                                                     | NM_004056      | he protein encoded by this gene was initially named CA-related protein because of sequence similarity to other known carbonic anhydrase genes. However, the gene product lacks carbonic anhydrase activity (i.e., the reversible hydration of carbon dioxide). The gene product continues to carry a carbonic anhydrase designation based on clear sequence identity to other members of the carbonic anhydrase gene family. The absence of CA8 gene transcription in the cerebellum of the lurcher mutant in mice with a neurologic defect suggests an important role for this acatalytic form.                                                                     |
| CADM4            | Cell adhesion molecule 4                                                                                                                    | NM_145296      | Involved in the cell-cell adhesion. Has calcium- and magnesium-independent cell-cell adhesion activity. May have tumor-suppressor activity                                                                                                                                                                                                                                                                                                                                                                                                                                                                                                                           |
| CD109            | CD109 molecule                                                                                                                              | NM_133493      | This gene encodes a member of the alpha2-macroglobulin/complement superfamily. The encoded GPI-linked glycoprotein is found on the cell surface of platelets, activated T-cells, and endothelial cells. The protein binds to and negatively regulates signaling of transforming growth factor beta (TGF-beta).                                                                                                                                                                                                                                                                                                                                                       |
| CNTN1            | Contactin 1                                                                                                                                 | NM_001843      | The protein encoded by this gene is a member of the immunoglobulin superfamily. It is a glycosylphosphatidylinositol (GPI)-anchored neuronal membrane protein that functions as a cell adhesion molecule. It may play a role in the formation of axon connections in the developing nervous system.                                                                                                                                                                                                                                                                                                                                                                  |
| EIF1AY           | Eukaryotic translation initiation factor 1A, Y-linked                                                                                       | NM_004681      | This gene encodes a protein similar to eukaryotic translation initiation factor 1A (EIF1A). EIF1A is required for the binding of the 43S complex (a 40S subunit, eIF2/GTP/Met-tRNAi and eIF3) to the 5' end of capped RNA.                                                                                                                                                                                                                                                                                                                                                                                                                                           |
| ENST00000388321  | snRNA, pseudogene                                                                                                                           | ---            | No protein product                                                                                                                                                                                                                                                                                                                                                                                                                                                                                                                                                                                                                                                   |
| EPHB1            | EPH receptor B1                                                                                                                             | NM_004441      | Receptor for members of the ephrin-B family. Binds to ephrin-B1, -B2 and -B3. Binding with the guidance cue ephrin-B2 at the optic chiasm midline redirect ventrotemporal (VT) retinal ganglion cells (RGCs) axons ipsilaterally. May be involved in cell-cell interactions in the nervous system                                                                                                                                                                                                                                                                                                                                                                    |
| FLRT3            | Fibronectin leucine rich transmembrane protein 3                                                                                            | NM_198391      | This gene encodes a member of the fibronectin leucine rich transmembrane protein (FLRT) family. FLRTs may function in cell adhesion and/or receptor signalling. Their protein structures resemble small leucine-rich proteoglycans found in the extracellular matrix.                                                                                                                                                                                                                                                                                                                                                                                                |
| GALC             | Galactosylceramidase                                                                                                                        | NM_000153      | This gene encodes a lysosomal protein which hydrolyzes the galactose ester bonds of galactosylceramide, galactosylsphingosine, lactosylceramide, and monogalactosyldiglyceride. Enzyme with very low activity responsible for the lysosomal catabolism of galactosylceramide, a major lipid in myelin, kidney and epithelial cells of small intestine and colon.                                                                                                                                                                                                                                                                                                     |
| LPAR4            | Lysophosphatidic acid receptor 4                                                                                                            | NM_005296      | This gene encodes a member of the lysophosphatidic acid receptor family. It may also be related to the P2Y receptors, a family of receptors that bind purine and pyrimidine nucleotides and are coupled to G proteins. The encoded protein may play a role in monocytic differentiation.                                                                                                                                                                                                                                                                                                                                                                             |
| GPR37L1          | G protein-coupled receptor 37 like 1                                                                                                        | NM_004767      | Orphan receptor                                                                                                                                                                                                                                                                                                                                                                                                                                                                                                                                                                                                                                                      |
| GRIA2            | Glutamate receptor, ionotropic, AMPA 2                                                                                                      | NM_001083619   | Ionotropic glutamate receptor. L-glutamate acts as an excitatory neurotransmitter at many synapses in the central nervous system. Binding of the excitatory neurotransmitter L-glutamate induces a conformation change, leading to the opening of the cation channel, and thereby converts the chemical signal to an electrical impulse. The receptor then desensitizes rapidly and enters a transient inactive state, characterized by the presence of bound agonist. In the presence of CACNG4 or CACNG7 or CACNG8, shows resensitization which is characterized by a delayed accumulation of current flux upon continued application of glutamate (By similarity) |
| KCNQ2            | Potassium voltage-gated channel, Shal-related subfamily, member 2                                                                           | NM_012281      | Pore-forming (alpha) subunit of voltage-gated rapidly inactivating A-type potassium channels. May contribute to I(To) current in heart and I(Sa) current in neurons. Channel properties are modulated by interactions with other alpha subunits and with regulatory subunits.                                                                                                                                                                                                                                                                                                                                                                                        |
| LPHN3            | Latrophilin 3                                                                                                                               | NM_015236      | This gene encodes a member of the latrophilin subfamily of G-protein coupled receptors (GPCR). Latrophilins mediate adhesion in both cell adhesion and signal transduction.                                                                                                                                                                                                                                                                                                                                                                                                                                                                                          |
| LPL              | Lipoprotein lipase                                                                                                                          | NM_000237      | Lipoprotein lipase (LPL), like LIPG, is a vascular lipase, however it is not synthesized in endothelial cells. It is anchored to the capillary endothelium by proteoglycans and catalyzes the hydrolysis of triglycerides to release free fatty acids into the circulation. LPL therefore initiates the processing of triglyceride-rich lipoproteins such as chylomicrons and VLDL.                                                                                                                                                                                                                                                                                  |
| LRP1B            | Low density lipoprotein receptor-related protein 1B                                                                                         | NM_018557      | LRP1B belongs to the low density lipoprotein (LDL) receptor gene family. These receptors play a wide variety of roles in normal cell function and development due to their interactions with multiple ligands.                                                                                                                                                                                                                                                                                                                                                                                                                                                       |
| LRRC4C           | Leucine rich repeat containing 4C                                                                                                           | NM_020929      | NLG1 is a specific binding partner for netrin G1, which is a member of the netrin family of axon guidance molecules.                                                                                                                                                                                                                                                                                                                                                                                                                                                                                                                                                 |
| MEGF10           | Multiple EGF-like-domains 10                                                                                                                | NM_032446      | Involved in phagocytosis by macrophages of apoptotic cells. Cooperates with ABCA1 during engulfment. Destabilizes the oligomeric assemblies of the ABCA1 transporter. Plays a role in cell adhesion. Inhibits cell motility and cell proliferation in vitro. Promotes formation of large intracellular vacuoles.                                                                                                                                                                                                                                                                                                                                                     |
| PCDH10           | Protocadherin 10                                                                                                                            | NM_032961      | This gene belongs to the protocadherin gene family, a subfamily of the cadherin superfamily. The mRNA encodes a cadherin-related neuronal receptor thought to play a role in the establishment and function of specific cell-cell connections in the brain.                                                                                                                                                                                                                                                                                                                                                                                                          |
| PCDH15           | Protocadherin-related 15                                                                                                                    | NM_033056      | This gene is a member of the cadherin superfamily. Family members encode integral membrane proteins that mediate calcium-dependent cell-cell adhesion. It plays an essential role in maintenance of normal retinal and cochlear function.                                                                                                                                                                                                                                                                                                                                                                                                                            |
| PMP2             | Peripheral myelin protein 2                                                                                                                 | NM_002677      | May play a role in lipid transport protein in Schwann cells. May bind cholesterol.                                                                                                                                                                                                                                                                                                                                                                                                                                                                                                                                                                                   |
| RP54Y1           | Ribosomal protein S4, Y-linked 1                                                                                                            | NM_001008      | Ribosomal protein S4 is the only ribosomal protein known to be encoded by more than one gene, namely this gene and ribosomal protein S4, X-linked (RP54X). The 2 isoforms encoded by these genes are not identical, but are functionally equivalent.                                                                                                                                                                                                                                                                                                                                                                                                                 |
| SCN1A            | Sodium channel, voltage-gated, type I, alpha subunit                                                                                        | NM_006920      | Sodium channel, voltage-gated, type I, alpha subunit                                                                                                                                                                                                                                                                                                                                                                                                                                                                                                                                                                                                                 |
| SCRG1            | Stimulator of chondrogenesis 1                                                                                                              | NM_007281      | Scrapie-responsive gene 1 is associated with neurodegenerative changes observed in transmissible spongiform encephalopathies. It may play a role in host response to prion-associated infections.                                                                                                                                                                                                                                                                                                                                                                                                                                                                    |
| SEMA5A           | Sema domain, seven thrombospondin repeats (type 1 and type 1-like), transmembrane domain (TM) and short cytoplasmic domain, (semaphorin) 5A | NM_003966      | This gene belongs to the semaphorin gene family that encodes membrane proteins containing a semaphorin domain and several thrombospondin type-1 repeats. Members of this family are involved in axonal guidance during neural development.                                                                                                                                                                                                                                                                                                                                                                                                                           |
| SLITRK2          | SLIT and NTRK-like family, member 2                                                                                                         | NM_032539      | This gene encodes an integral membrane protein that contains two N-terminal leucine-rich repeats domains and contains C-terminal regions similar to neurotrophin receptors. The encoded protein may play a role in modulating neurite activity.                                                                                                                                                                                                                                                                                                                                                                                                                      |
| SNTG1            | Syntrophin, gamma 1                                                                                                                         | NM_018967      | Adapter protein that binds to and probably organizes the subcellular localization of a variety of proteins. May link various receptors to the actin cytoskeleton and the dystrophin glycoprotein complex (By similarity). May participate in regulating the subcellular location of diacylglycerol kinase-zeta to ensure that diacylglycerol is rapidly inactivated following receptor activation.                                                                                                                                                                                                                                                                   |
| UBL3             | Ubiquitin-like 3                                                                                                                            | NM_007106      | <b>No information is provided.</b>                                                                                                                                                                                                                                                                                                                                                                                                                                                                                                                                                                                                                                   |
| ZFP3             | Zinc finger protein 3 homolog (mouse)                                                                                                       | NM_153018      | May be involved in transcriptional regulation.                                                                                                                                                                                                                                                                                                                                                                                                                                                                                                                                                                                                                       |
